# Supplementary material for: The Impact of Nutrient Limitation and Harvest Method on the Wet Preservation of Chlorella vulgaris Biomass
Source: MDPI journal article supplement (doi:10.3390/bioengineering10050600), 2023-05-17
Supplement: s1 [file s1]

# The impact of nutrient limitation and harvest method on the wet preservation of *Chlorella vulgaris* biomass

Joran Verspreet<sup>1</sup>, Christina M. Kuchendorf<sup>2</sup>, Bärbel Ackermann<sup>2,\*1</sup>, and Leen Bastiaens<sup>1</sup>

## Supplementary information

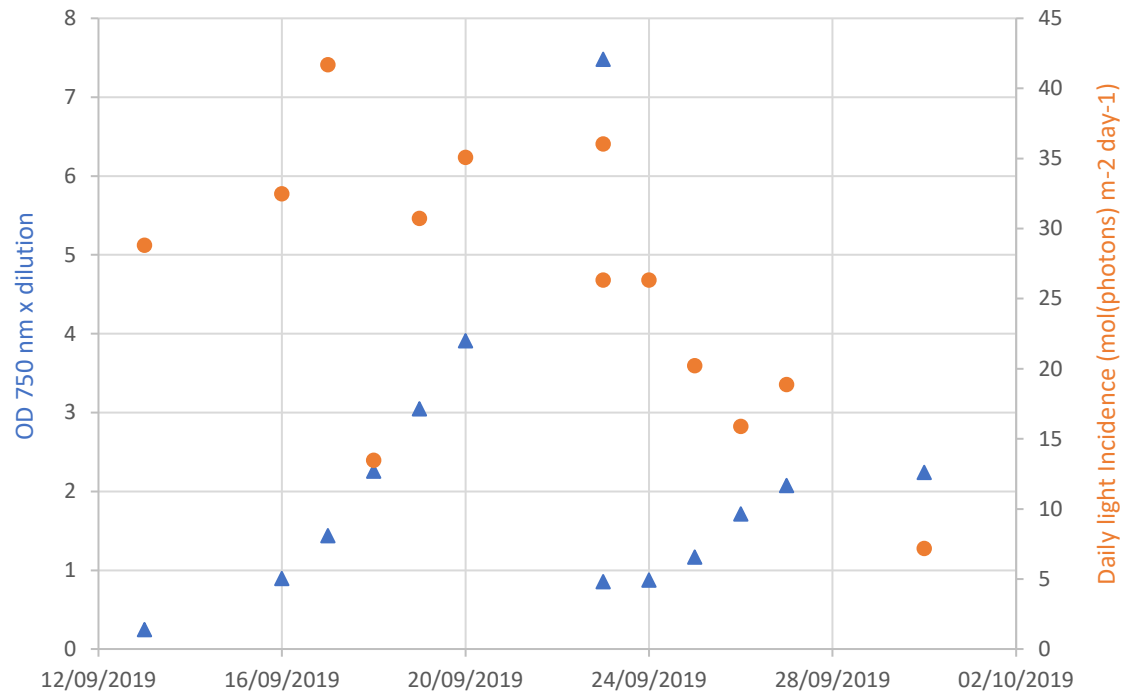

Supplementary Figure S1. Well-fed algae culture growth curve. The (OD at 750 nm x dilution rate) is plotted by blue triangles. Daily light incidence is shown by orange dots.

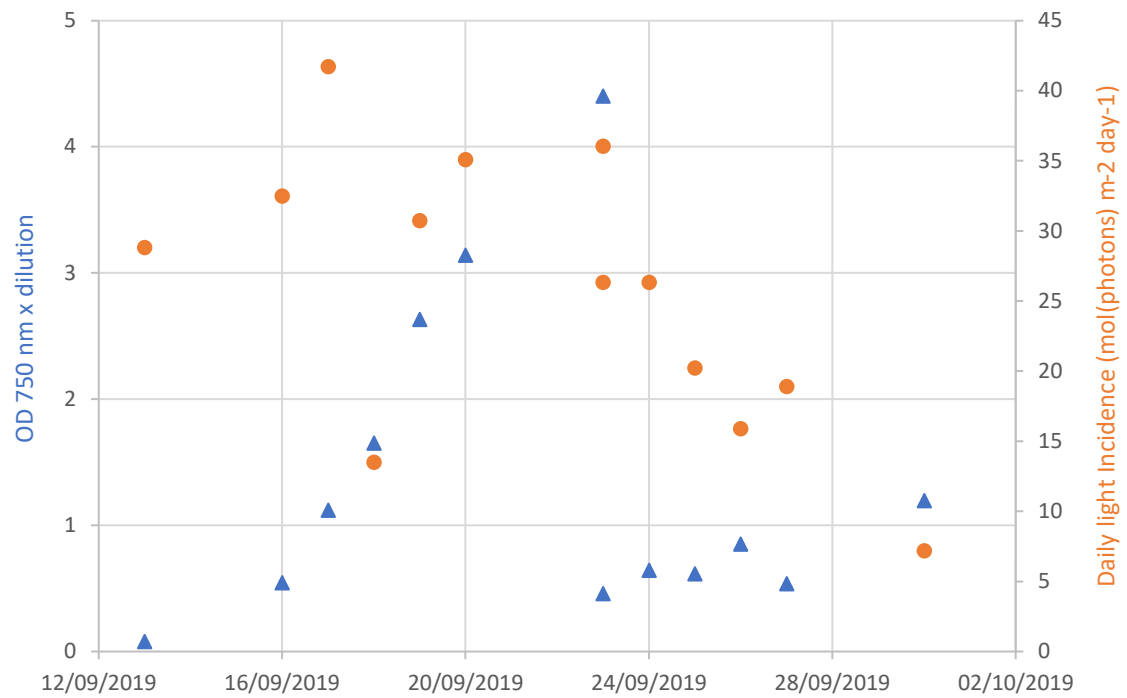

Supplementary Figure S2. The temporarily-unfed algae culture growth curve. The culture received no nutrients in the last week. The (OD at 750 nm x dilution rate) is plotted by blue triangles. Daily light incidence is shown by orange dots.

Supplementary Table S1. Outdoor temperature during algae growth and culture pH values.

|            | <b>Maximum<br/>temperature (°C)<br/>day N-1</b> | <b>Minimum<br/>temperature (°C)<br/>day N-1</b> | <b>Temperature<br/>range (°C) day N-1</b> | <b>Average<br/>temperature (°C)<br/>day N-1</b> | <b>pH well-fed<br/>culture</b> | <b>pH nutrient-<br/>depleted culture</b> |
|------------|-------------------------------------------------|-------------------------------------------------|-------------------------------------------|-------------------------------------------------|--------------------------------|------------------------------------------|
| 13/09/2019 | 18                                              | 9.7                                             | 8.3                                       | 13.1                                            | no data                        | no data                                  |
| 16/09/2019 | 20.8                                            | 13.7                                            | 7.1                                       | 17.5                                            | 7.23                           | 7.69                                     |
| 17/09/2019 | 20.4                                            | 12.3                                            | 8.1                                       | 15.3                                            | 7.14                           | 7.68                                     |
| 18/09/2019 | 18.1                                            | 7.9                                             | 10.2                                      | 13.9                                            | 6.96                           | 7.34                                     |
| 19/09/2019 | 17.2                                            | 4.9                                             | 12.3                                      | 11.2                                            | 6.9                            | 7                                        |
| 20/09/2019 | 17.1                                            | 4.4                                             | 12.7                                      | 10.6                                            | 6.78                           | 7.27                                     |
| 23/09/2019 | 19.8                                            | 4.1                                             | 15.7                                      | 12.1                                            | 6.57                           | 7.42                                     |
| 23/09/2019 | 19.8                                            | 12.5                                            | 7.3                                       | 16.0                                            | no data                        | no data                                  |
| 24/09/2019 | 19.8                                            | 12.5                                            | 7.3                                       | 16.0                                            | 6.92                           | 7.35                                     |
| 25/09/2019 | 19.7                                            | 12.2                                            | 7.5                                       | 14.8                                            | 6.95                           | 7.46                                     |
| 26/09/2019 | 18.5                                            | 13                                              | 5.5                                       | 15.8                                            | 6.86                           | 7.33                                     |
| 27/09/2019 | 19                                              | 14.5                                            | 4.5                                       | 16.8                                            | 8.01                           | 8.17                                     |
| 30/09/2019 | 20                                              | 12.1                                            | 7.9                                       | 15.8                                            | 7.18                           | 7.56                                     |

Supplementary Table S2. Dry matter and organic matter concentrations of algae at the start of the preservation test.

| Nutritional status at harvest | Harvest method            | DM (%)    | OM (%)    |
|-------------------------------|---------------------------|-----------|-----------|
| Well-fed                      | Continuous centrifugation | 6.7 ± 0.0 | 6.4 ± 0.1 |
| Well-fed                      | Batch centrifugation      | 8.1 ± 0.7 | 7.7 ± 0.6 |
| Temporarily unfed             | Continuous centrifugation | 9.2 ± 0.2 | 9.2 ± 0.2 |
| Temporarily unfed             | Batch centrifugation      | 8.9 ± 0.2 | 9.0 ± 0.2 |

Supplementary Table S3. Results factorial ANOVA analysis. Impact on total organic acid levels.

| Effect                                        | F   | P-value |
|-----------------------------------------------|-----|---------|
| time                                          | 82  | <0.001  |
| harvest method                                | 350 | <0.001  |
| culture status at harvest                     | 325 | <0.001  |
| time*harvest method                           | 46  | <0.001  |
| time*culture status at harvest                | 34  | <0.001  |
| harvest method*culture status at harvest      | 0.7 | 0.396   |
| time*harvest method*culture status at harvest | 38  | <0.001  |

Supplementary Table S4. Results factorial ANOVA analysis. Impact on lactic acid.

| Effect                                        | F     | P-value |
|-----------------------------------------------|-------|---------|
| time                                          | 15    | <0.001  |
| harvest method                                | 957   | <0.001  |
| culture status at harvest                     | 10300 | <0.001  |
| time*harvest method                           | 385   | <0.001  |
| time*culture status at harvest                | 257   | <0.001  |
| harvest method*culture status at harvest      | 325   | <0.001  |
| time*harvest method*culture status at harvest | 98    | <0.001  |

Supplementary Table S5. Results factorial ANOVA analysis. Impact on acetic acid.

| Effect                                        | F   | P-value |
|-----------------------------------------------|-----|---------|
| time                                          | 937 | <0.001  |
| harvest method                                | 829 | <0.001  |
| culture status at harvest                     | 165 | <0.001  |
| time*harvest method                           | 427 | <0.001  |
| time*culture status at harvest                | 118 | <0.001  |
| harvest method*culture status at harvest      | 165 | <0.001  |
| time*harvest method*culture status at harvest | 52  | <0.001  |

*Supplementary Table S6. Results factorial ANOVA analysis. Impact on succinic acid.*

| <b>Effect</b>                                 | <b>F</b> | <b>P-value</b> |
|-----------------------------------------------|----------|----------------|
| time                                          | 181      | <0.001         |
| harvest method                                | 1        | 0.324          |
| culture status at harvest                     | 3283     | <0.001         |
| time*harvest method                           | 82       | <0.001         |
| time*culture status at harvest                | 65       | <0.001         |
| harvest method*culture status at harvest      | 367      | <0.001         |
| time*harvest method*culture status at harvest | 368      | <0.001         |

*Supplementary Table S7. Results factorial ANOVA analysis. Impact on propionic acid.*

| <b>Effect</b>                                 | <b>F</b> | <b>P-value</b> |
|-----------------------------------------------|----------|----------------|
| time                                          | 337      | <0.001         |
| harvest method                                | 185      | <0.001         |
| culture status at harvest                     | 1052     | <0.001         |
| time*harvest method                           | 85       | <0.001         |
| time*culture status at harvest                | 301      | <0.001         |
| harvest method*culture status at harvest      | 244      | <0.001         |
| time*harvest method*culture status at harvest | 121      | <0.001         |

*Supplementary Table S8. Results factorial ANOVA analysis. Impact on citric acid.*

| <b>Effect</b>                                 | <b>F</b> | <b>P-value</b> |
|-----------------------------------------------|----------|----------------|
| time                                          | 198      | <0.001         |
| harvest method                                | 128      | <0.001         |
| culture status at harvest                     | 8101     | <0.001         |
| time*harvest method                           | 39       | <0.001         |
| time*culture status at harvest                | 198      | <0.001         |
| harvest method*culture status at harvest      | 128      | <0.001         |
| time*harvest method*culture status at harvest | 39       | <0.001         |

*Supplementary Table S9. Results factorial ANOVA analysis. Impact on pH.*

| <b>Effect</b>                                 | <b>F</b> | <b>P-value</b> |
|-----------------------------------------------|----------|----------------|
| time                                          | 27       | <0.001         |
| harvest method                                | 570      | <0.001         |
| culture status at harvest                     | 25435    | <0.001         |
| time*harvest method                           | 246      | <0.001         |
| time*culture status at harvest                | 44       | <0.001         |
| harvest method*culture status at harvest      | 45       | <0.001         |
| time*harvest method*culture status at harvest | 17       | <0.001         |

Supplementary Table S10. Results factorial ANOVA analysis. Impact on lipid content.

| Effect                                        | F     | P-value |
|-----------------------------------------------|-------|---------|
| time                                          | 0.25  | 0.781   |
| harvest method                                | 0.085 | 0.774   |
| culture status at harvest                     | 0.243 | 0.628   |
| time*harvest method                           | 0.11  | 0.896   |
| time*culture status at harvest                | 0.983 | 0.393   |
| harvest method*culture status at harvest      | 0.192 | 0.667   |
| time*harvest method*culture status at harvest | 0.553 | 0.585   |

Supplementary Table S11. Results factorial ANOVA analysis. Impact on FFA levels.

| Effect                                        | F     | P-value |
|-----------------------------------------------|-------|---------|
| time                                          | 29.66 | <0.001  |
| harvest method                                | 0.03  | 0.872   |
| culture status at harvest                     | 16.93 | 0.001   |
| time*harvest method                           | 3.32  | 0.059   |
| time*culture status at harvest                | 24.72 | <0.001  |
| harvest method*culture status at harvest      | 28.38 | <0.001  |
| time*harvest method*culture status at harvest | 8.03  | 0.003   |

Supplementary Table S12. PCA eigenvalues and percentage of variance associated with each eigenvalue.

| Eigenvalue number | Eigenvalue | % Total variance | Cumulative % total variance |
|-------------------|------------|------------------|-----------------------------|
| 1                 | 4.8        | 52.8             | 52.8                        |
| 2                 | 2.1        | 23.3             | 76.1                        |
| 3                 | 1.0        | 11.0             | 87.1                        |
| 4                 | 0.7        | 8.1              | 95.2                        |
| 5                 | 0.3        | 3.2              | 98.3                        |
| 6                 | 0.1        | 0.9              | 99.3                        |
| 7                 | 0.1        | 0.6              | 99.9                        |
| 8                 | 0.0        | 0.1              | 100.0                       |
| 9                 | 0.0        | 0.0              | 100.0                       |

Supplementary Table S13. Factor-variable correlations (factor loadings), based on correlations.

|                | Factor 1 | Factor 2 | Factor 3 | Factor 4 | Factor 5 | Factor 6 | Factor 7 | Factor 8 | Factor 9 |
|----------------|----------|----------|----------|----------|----------|----------|----------|----------|----------|
| acetic acid    | 0.07     | -0.94    | -0.03    | -0.20    | 0.25     | 0.13     | 0.05     | 0.00     | -0.01    |
| propionic acid | -0.64    | -0.65    | 0.09     | -0.32    | -0.12    | -0.21    | 0.02     | -0.01    | 0.00     |
| lactic acid    | 0.98     | -0.04    | 0.14     | 0.01     | -0.03    | -0.04    | -0.13    | 0.01     | -0.01    |
| succinic acid  | -0.87    | -0.29    | 0.10     | -0.02    | -0.36    | 0.15     | -0.06    | 0.00     | 0.00     |
| citric acid    | 0.93     | 0.10     | 0.01     | -0.24    | -0.23    | 0.02     | 0.12     | 0.05     | 0.00     |
| sum acids      | 0.83     | -0.48    | 0.17     | -0.18    | 0.00     | 0.01     | -0.10    | 0.01     | 0.02     |
| pH             | -0.99    | 0.04     | 0.01     | 0.03     | 0.13     | -0.02    | -0.06    | 0.07     | 0.00     |
| lipids         | -0.17    | 0.24     | 0.95     | -0.03    | 0.07     | 0.02     | 0.04     | 0.00     | 0.00     |
| FFA            | 0.26     | -0.64    | 0.12     | 0.71     | -0.07    | -0.04    | 0.04     | 0.01     | 0.00     |

Supplementary Table S14. Spearman Rank Order Correlations among average values. \*Marked correlations are significant at  $P < 0.05$ .

| Variable       | acetic acid | propionic acid | lactic acid | succinic acid | citric acid | sum    | pH     | Lipids | FFA   |
|----------------|-------------|----------------|-------------|---------------|-------------|--------|--------|--------|-------|
| acetic acid    | 1.00        | 0.16           | 0.01        | -0.13         | 0.01        | 0.47   | -0.15  | -0.41  | 0.41  |
| propionic acid | 0.16        | 1.00           | -0.83*      | 0.83*         | -0.76*      | -0.62* | 0.75*  | -0.07  | -0.12 |
| lactic acid    | 0.01        | -0.83*         | 1.00        | -0.80*        | 0.88*       | 0.77*  | -0.90* | 0.09   | 0.17  |
| succinic acid  | -0.13       | 0.83*          | -0.80*      | 1.00          | -0.82*      | -0.63* | 0.76*  | 0.26   | -0.09 |
| citric acid    | 0.01        | -0.76*         | 0.88*       | -0.82*        | 1.00        | 0.76*  | -0.89* | -0.04  | -0.13 |
| sum            | 0.47        | -0.62*         | 0.77*       | -0.63*        | 0.76*       | 1.00   | -0.88* | -0.02  | 0.22  |
| pH             | -0.15       | 0.75*          | -0.90*      | 0.76*         | -0.89*      | -0.88* | 1.00   | 0.01   | -0.15 |
| Lipids         | -0.41       | -0.07          | 0.09        | 0.26          | -0.04       | -0.02  | 0.01   | 1.00   | -0.13 |
| FFA            | 0.41        | -0.12          | 0.17        | -0.09         | -0.13       | 0.22   | -0.15  | -0.13  | 1.00  |
